# Supplementary material for: Solid solution-type Sm–Pr–O supported nickel-based catalysts for auto-thermal reforming of acetic acid: the role of Pr in solid solution
Source: Royal Society of Chemistry journal article supplement (doi:10.1039/d4nj00144c), 2024-01-01
Supplement: d4nj00144c1.pdf [file d4nj00144c1.pdf]

## **Solid solution-type Sm-Pr-O supported nickel-based catalysts for auto-thermal reforming of acetic acid: Role of Pr in solid solution**

Jinbo Liu<sup>1,2</sup>, Jia Huang<sup>2</sup>, Chenyu Ding<sup>2</sup>, Fuxia Liao<sup>2</sup>, Chenghong Shu<sup>2</sup>, Lihong Huang<sup>1,2,\*</sup>

Author affiliations

<sup>1</sup> State Key Laboratory of Geohazard Prevention and Geoenvironment Protection, Chengdu University of Technology, Chengdu; 610059, China

<sup>2</sup> College of Materials and Chemistry & Chemical Engineering, Chengdu University of Technology, Chengdu 610059, China

\*Address all correspondence to this author. e-mail: [huanglihong06@cdut.cn](mailto:huanglihong06@cdut.cn) (L. Huang)

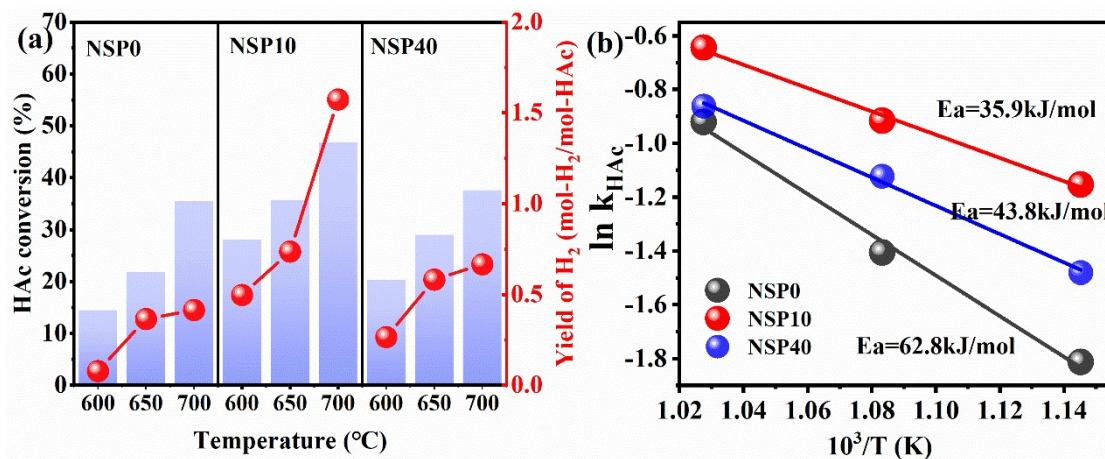

**Fig. S1.** HAc conversion (a) and apparent activation energy (b) of NSP catalysts.

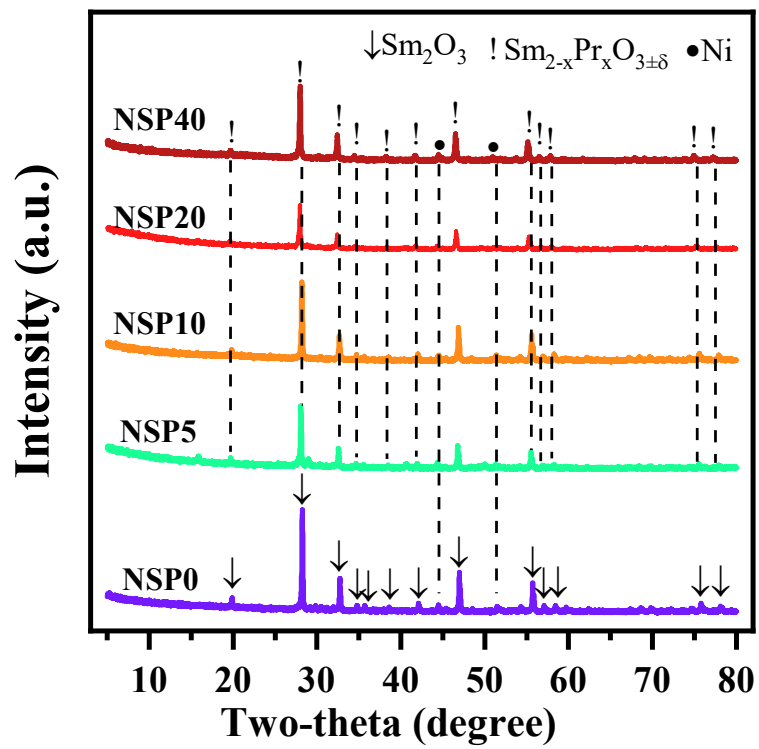

Fig. S2. XRD patterns of the spent catalysts.

**Table S1** Ni<sup>0</sup> and supports particle sizes of NSP catalysts and crystal structure data.

| catalysts | Crystallite size of Ni <sup>0</sup> estimated by XRD (nm) |       | Lattice parameters (Å) | d-spacing (Å) | Lattice strain (%) |
|-----------|-----------------------------------------------------------|-------|------------------------|---------------|--------------------|
|           | Reduce                                                    | Spent | a/b/c                  |               |                    |
| NSP0      | 57.9                                                      | 70.8  | 10.9313                | 3.1697        | 0.287              |
| NSP5      | 55.3                                                      | 74.5  | 10.9309                | 3.1685        | 0.302              |
| NSP10     | 53.9                                                      | 54.8  | 10.9280                | 3.1652        | 0.332              |
| NSP20     | 49.2                                                      | 67.4  | 10.9251                | 3.1564        | 0.306              |
| NSP40     | 45.4                                                      | 45.7  | 10.9139                | 3.1510        | 0.324              |

**Table S2** Hydrogen consumption and Ni<sup>0</sup> reducibility of NSP catalysts.

| Catalysts | Hydrogen consumption (mmol/g) |       |       | Ni <sup>0</sup>  |
|-----------|-------------------------------|-------|-------|------------------|
|           | Peak1                         | Peak2 | Peak3 | Reducibility (%) |
| NSP0      | 0.073                         | 0.29  | -     | 17.8             |
| NSP5      | 0.089                         | 0.31  | 0.074 | 19.6             |
| NSP10     | 0.095                         | 0.38  | 0.12  | 23.7             |
| NSP20     | 0.059                         | 0.42  | 0.077 | 23.8             |
| NSP40     | 0.059                         | 0.54  | 0.070 | 29.5             |

**Table S3** The surface compositions of NSP catalysts.

| Catalyst | Ni <sup>0</sup> /(Ni <sup>0</sup> +Ni <sup>2+</sup> ) |       | O <sub>II</sub> /(O <sub>I</sub> +O <sub>II</sub> +O <sub>III</sub> ) |       | Sm <sup>2+</sup> /(Sm <sup>2+</sup> +Sm <sup>3+</sup> ) |       | Pr <sup>3+</sup> /(Pr <sup>3+</sup> +Pr <sup>4+</sup> ) |       |
|----------|-------------------------------------------------------|-------|-----------------------------------------------------------------------|-------|---------------------------------------------------------|-------|---------------------------------------------------------|-------|
|          | Reduced                                               | Spent | Reduced                                                               | Spent | Reduced                                                 | Spent | Reduced                                                 | Spent |
| NSP0     | 27.3%                                                 | 22.4% | 65.3%                                                                 | 60.4% | 25.2%                                                   | 32.0% | -                                                       | -     |
| NSP10    | 30.4%                                                 | 28.8% | 74.5%                                                                 | 73.1% | 33.4%                                                   | 28.7% | 36.5%                                                   | 39.3% |
| NSP40    | 31.6%                                                 | 25.1% | 58.3%                                                                 | 56.2% | 30.7%                                                   | 32.4% | 40.8%                                                   | 33.6% |

**Table S4** Ni<sup>0</sup> dispersion, Ea and TOF of NSP catalysts.

| Catalysts | Ni <sup>0</sup> dispersion <sup>a</sup> (%) | TOF-H <sub>2</sub> <sup>b</sup> (10 <sup>-2</sup> s <sup>-1</sup> ) | E <sub>a</sub> (KJ/mol) |
|-----------|---------------------------------------------|---------------------------------------------------------------------|-------------------------|
| NSP0      | 3.6                                         | 2.83                                                                | 62.8                    |
| NSP10     | 24.8                                        | 4.99                                                                | 35.9                    |
| NSP40     | 13.7                                        | 3.49                                                                | 43.8                    |

<sup>a</sup> Obtained from H<sub>2</sub>-TPD by assuming H<sub>ad</sub>/Ni<sup>0</sup><sub>surf</sub>=1.

<sup>b</sup> Calculated by Equation 5.

Table S5 Comparison of hydrogen production from reforming.

| Catalyst                                              | T (°C) | O <sub>2</sub> /C | Time (h) | H <sub>2</sub> yield (%) | Ref       |
|-------------------------------------------------------|--------|-------------------|----------|--------------------------|-----------|
| Ni/Ce <sub>1-x</sub> Y <sub>x</sub> O <sub>2-δ</sub>  | 700    | 0.28              | 10       | 95                       | [1]       |
| Ni@SiO <sub>2</sub> -T                                | 750    | no statistics     | 10       | 58                       | [2]       |
| Pt-Al <sub>2</sub> O <sub>3</sub>                     | 771    | no statistics     | 2        | 15                       | [3]       |
| Co-Ce-O                                               | 600    | no statistics     | 10       | 94                       | [4]       |
| Co-Ba-Al                                              | 650    | 0.28              | 10       | 93                       | [5]       |
| Ni/Sm <sub>2-x</sub> Pr <sub>x</sub> O <sub>3±δ</sub> | 750    | 0.28              | 10       | 98                       | This work |

## Reference

1. Su Y, Shu C, Ding C, Chen Q, Xu Y, Sheng J, et al. Solid solution of Ce<sub>1-x</sub>Y<sub>x</sub>O<sub>2-δ</sub> supported nickel-based catalysts for auto-thermal reforming of acetic acid with high resistance to coking. 2024;101589.
2. Pu J, Nishikado K, Wang N, Nguyen TT, Maki T, Qian EWJACBE. Core-shell nickel catalysts for the steam reforming of acetic acid. 2018; 224:69-79.
3. Taherian Z, Gharahshiran VS, Khataee A, Orooji YJJoI, Chemistry E. Anti-coking freeze-dried NiMgAl catalysts for dry and steam reforming of methane. 2021; 103:187-194.
4. Hu X, Ding C, Wang Q, Chen H, Jia X, Huang LJICC. Preparation of Co-Ce-O catalysts and its application in auto-thermal reforming of acetic acid. 2022; 141:109537.

5. Xu Y, Song Y, Chen H, Liao F, Huang J, Huang LJJoS-GS, et al. Influence of Ba on Co-Al-Ba composite oxide catalysts in auto-thermal reforming of acetic acid for hydrogen production. 2023; 105(1):202-211.
